# Supplementary material
Source: MDPI journal article supplement (https://www.mdpi.com/2073-4441/10/11/1660)

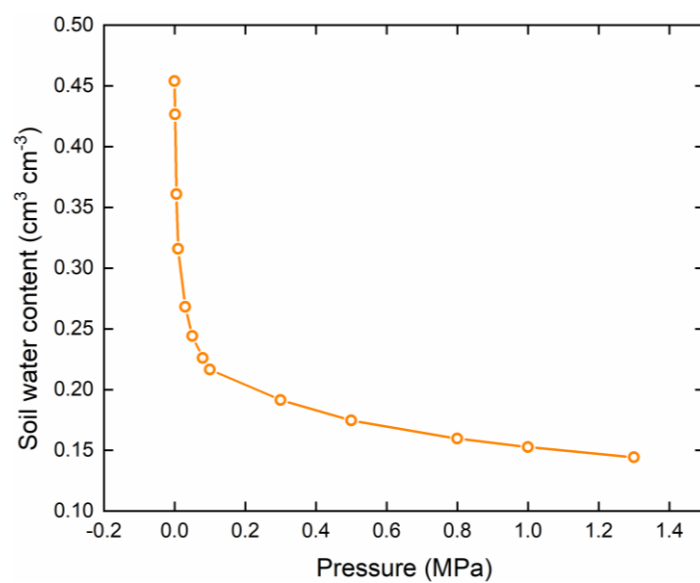

**Figure S1.** Soil water retention curve of the homogenous soil in the WTDPD.

Supplement: s1 [file s1]
